# Supplementary material
Source: MDPI journal article supplement (https://www.mdpi.com/2227-9040/9/5/93)
Supplement: s1 [file s1]

# Supporting information

## Table of contents

|                                          |    |
|------------------------------------------|----|
| Synthesis of Receptors .....             | 2  |
| Scheme 2. Synthesis of Receptor 1. ....  | 3  |
| Scheme S3. Synthesis of receptor 2. .... | 5  |
| Scheme S4. Synthesis of receptor 3. .... | 6  |
| 2D NMR spectra of receptor 2 .....       | 8  |
| NMR titrations.....                      | 9  |
| Dilution experiment. ....                | 16 |
| UV-Vis titrations. ....                  | 16 |
| Single crystal X-ray analysis.....       | 17 |
| DFT calculations .....                   | 17 |

## Synthesis of Receptors

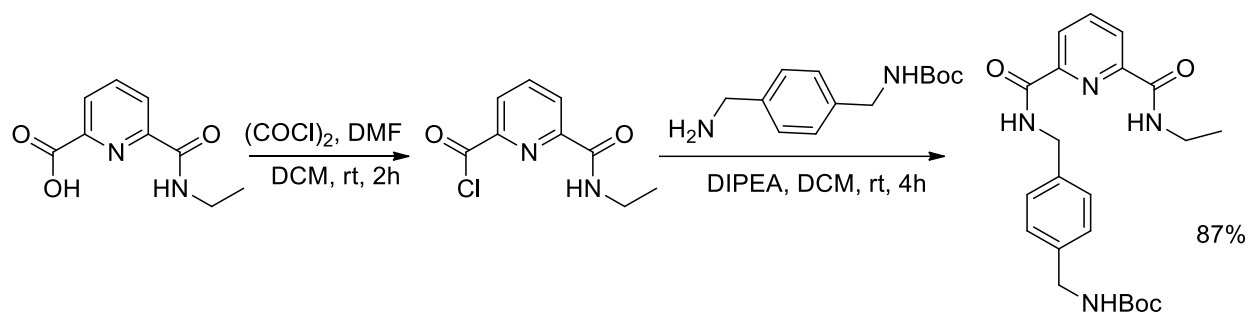

**Scheme S1.** Synthesis of tert-butyl-4-((6-(ethylcarbamoyl)picolinamido)methyl)benzylcarbamate.

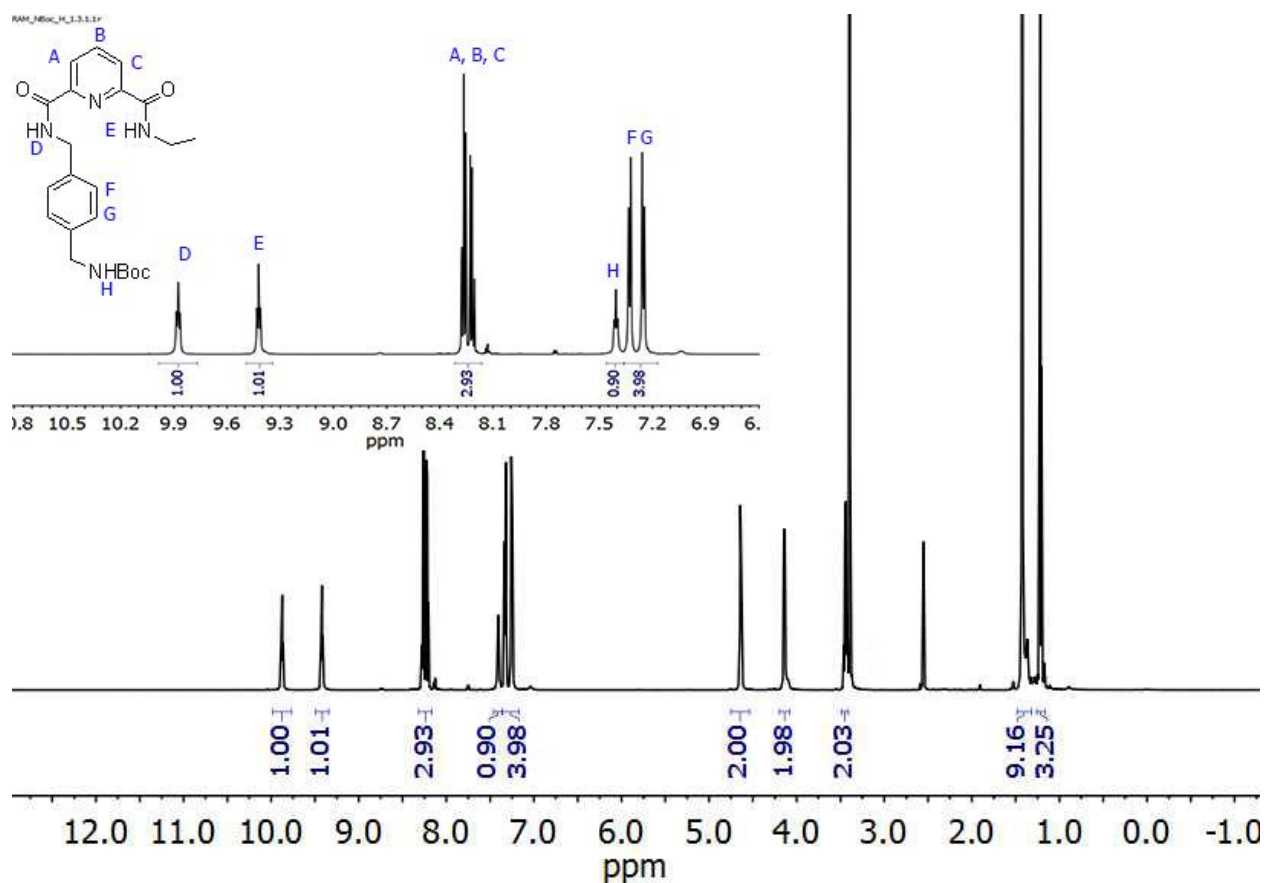

**Figure S1.** <sup>1</sup>H NMR spectrum of the Boc-protected compound **4**.

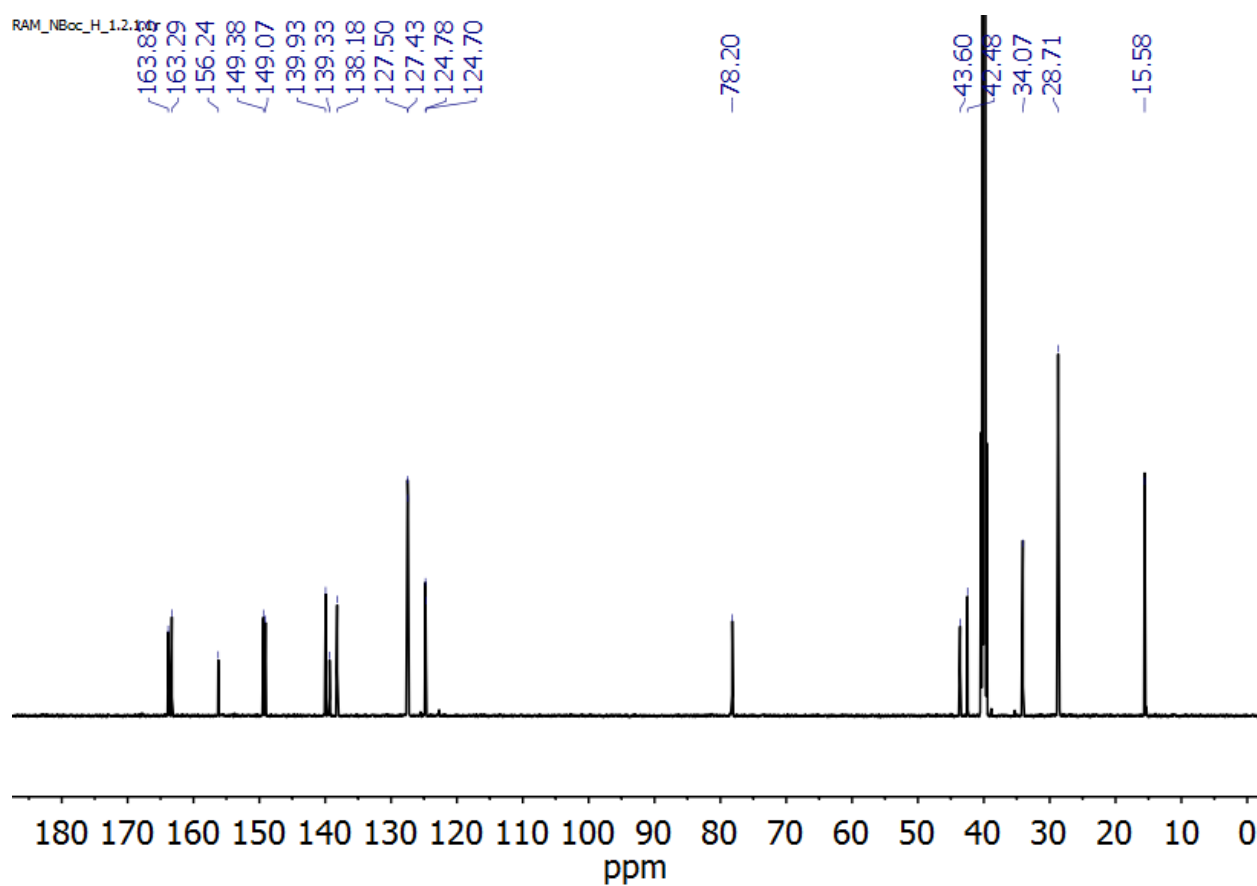

**Figure S2.**  $^{13}\text{C}$  NMR spectrum of the Boc-protected compound **4**.

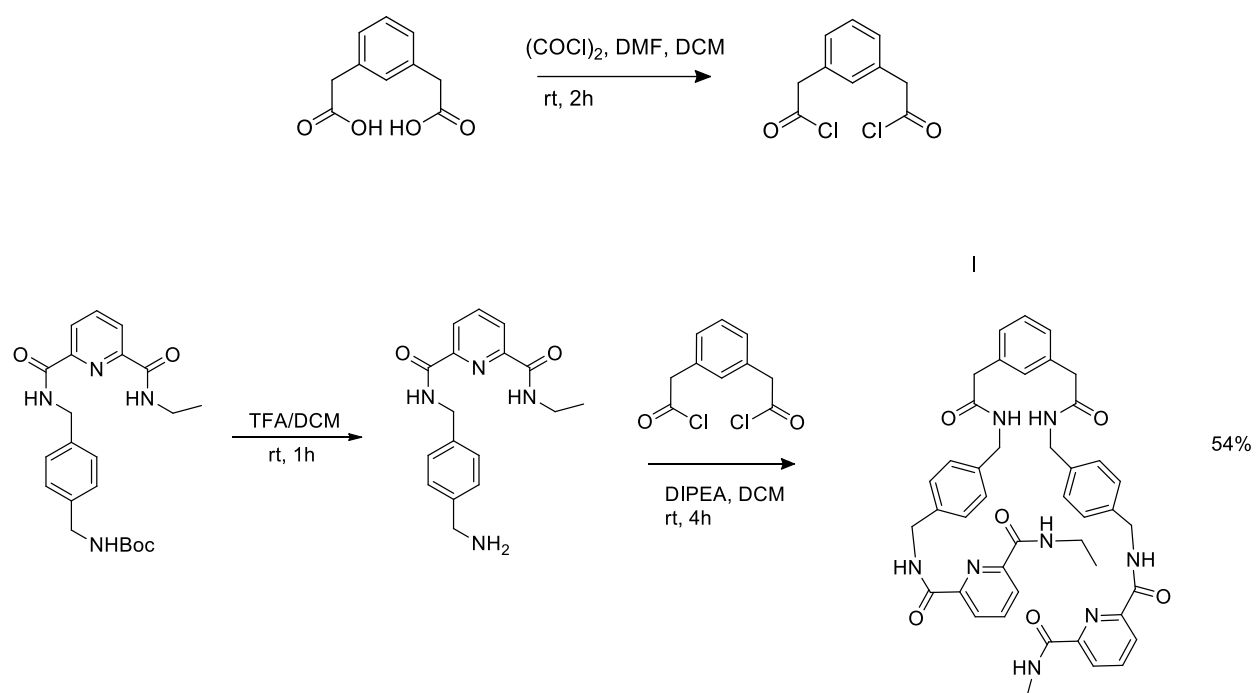

**Scheme 2.** Synthesis of Receptor **1**.

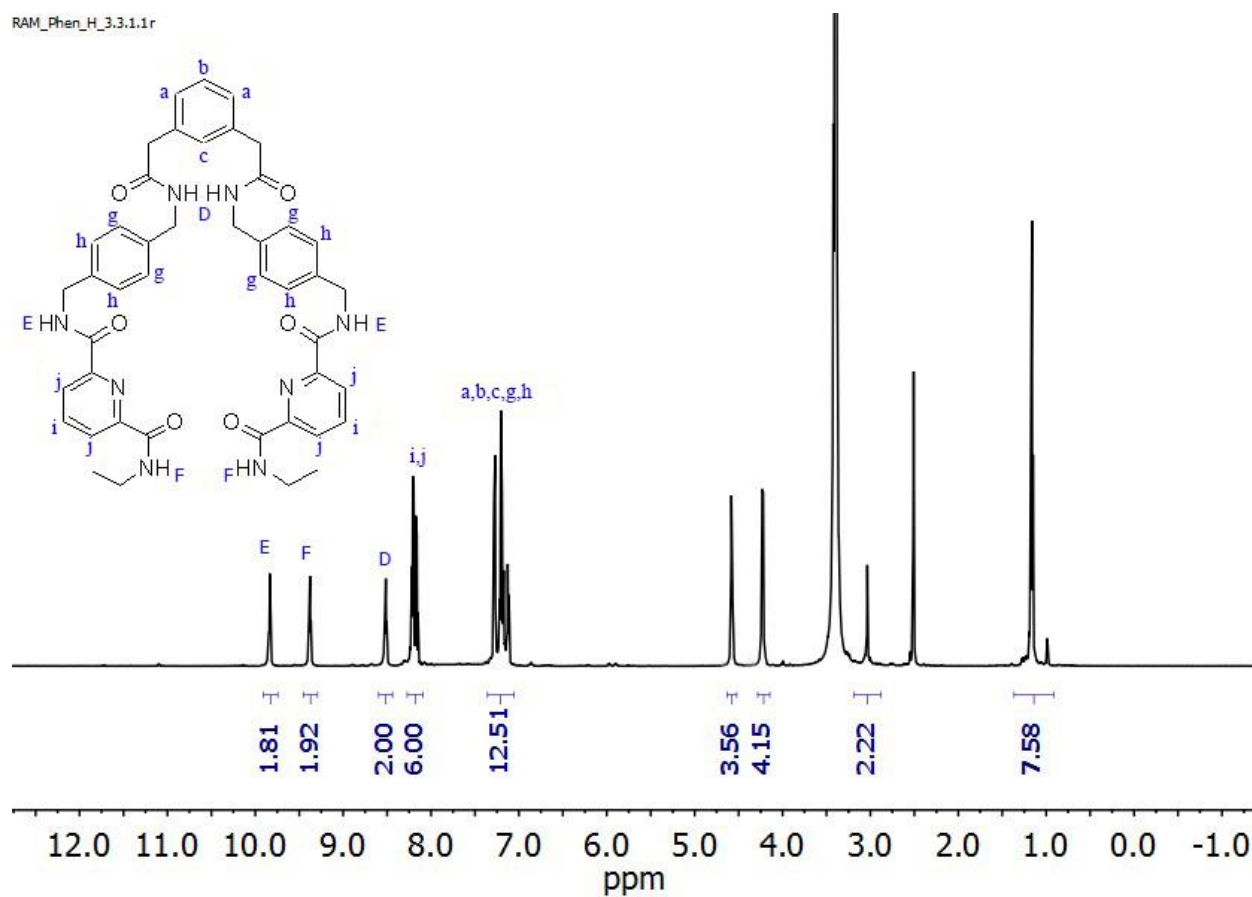

**Figure S3.** <sup>1</sup>H NMR spectrum of receptor **1**.

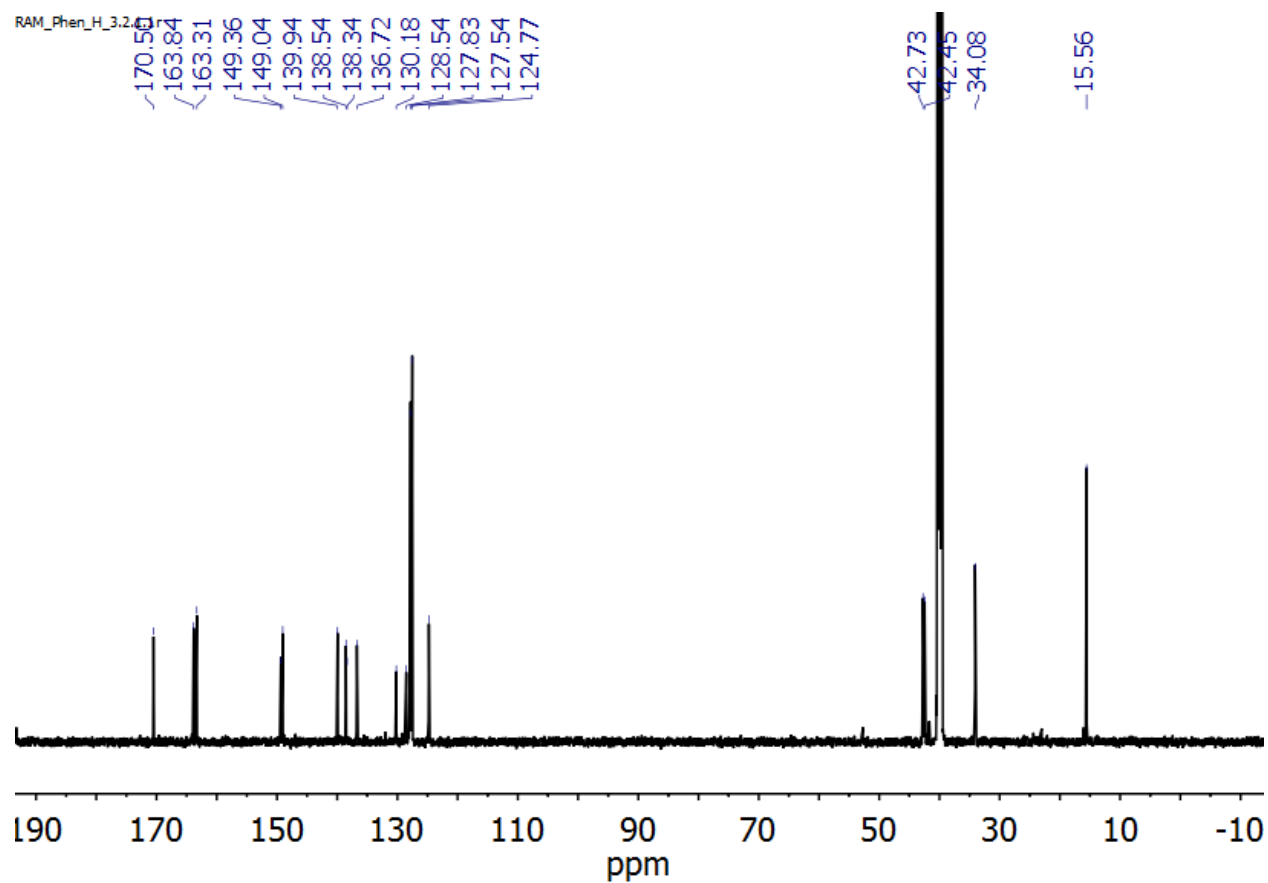

**Figure S4.** <sup>13</sup>C NMR spectrum of receptor **1**.

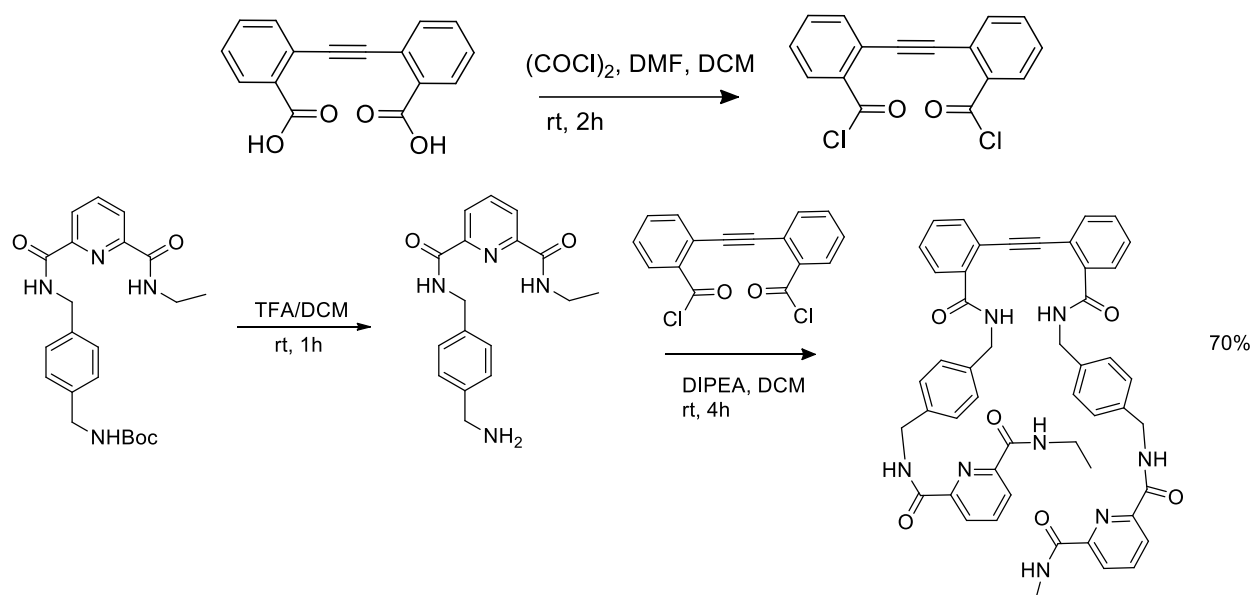

**Scheme S3.** Synthesis of receptor **2**.

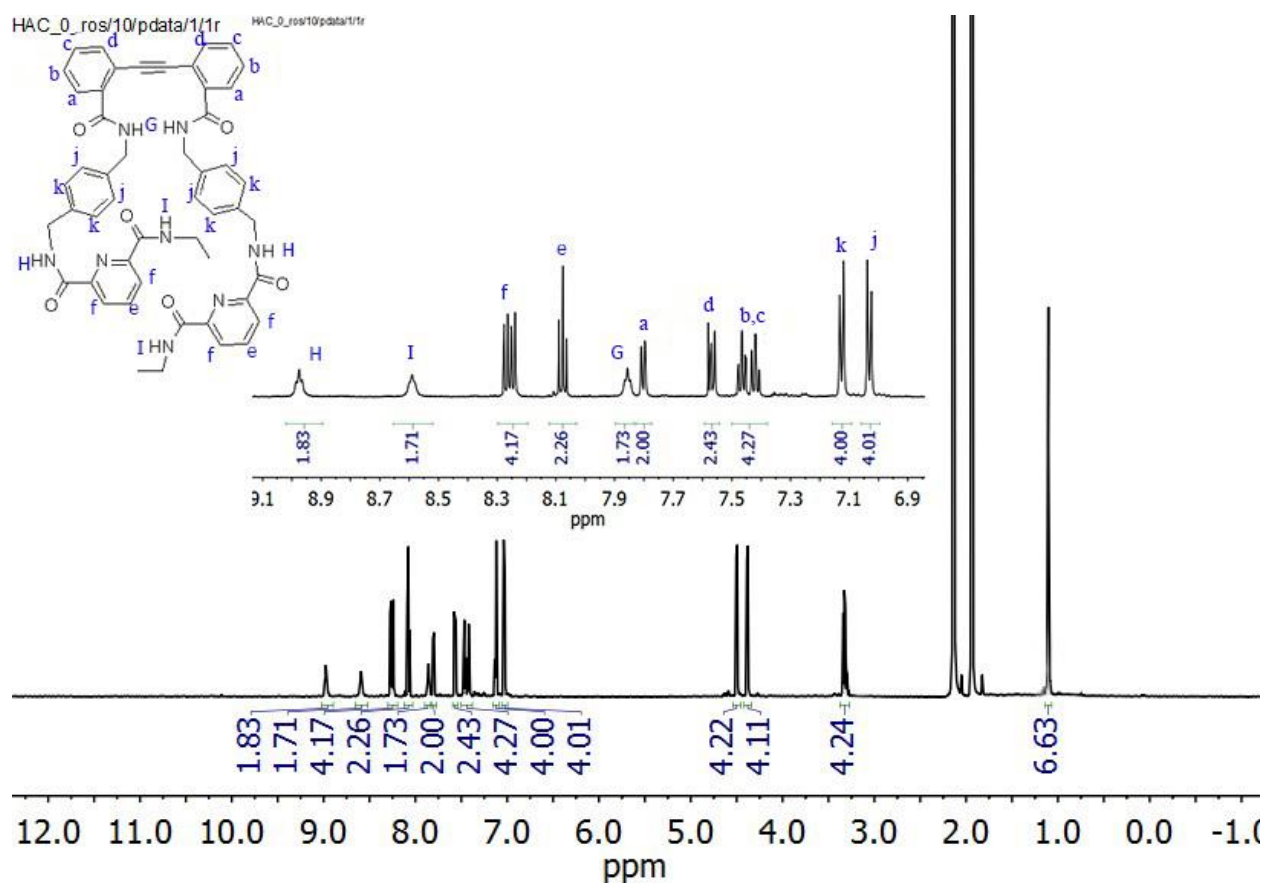

**Figure S5.** <sup>1</sup>H NMR spectrum of receptor **2**.

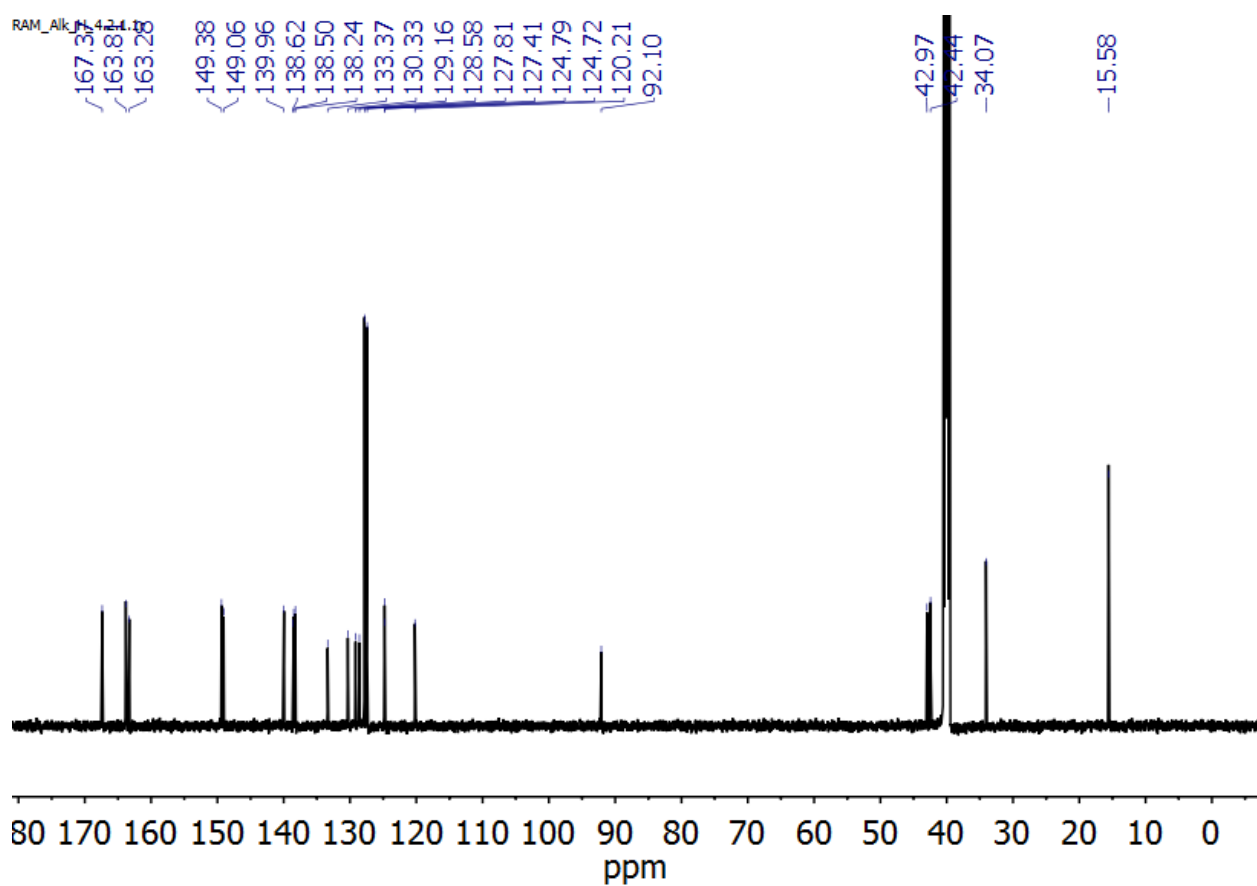

**Figure S6.**  $^{13}\text{C}$  NMR spectrum of receptor **2**.

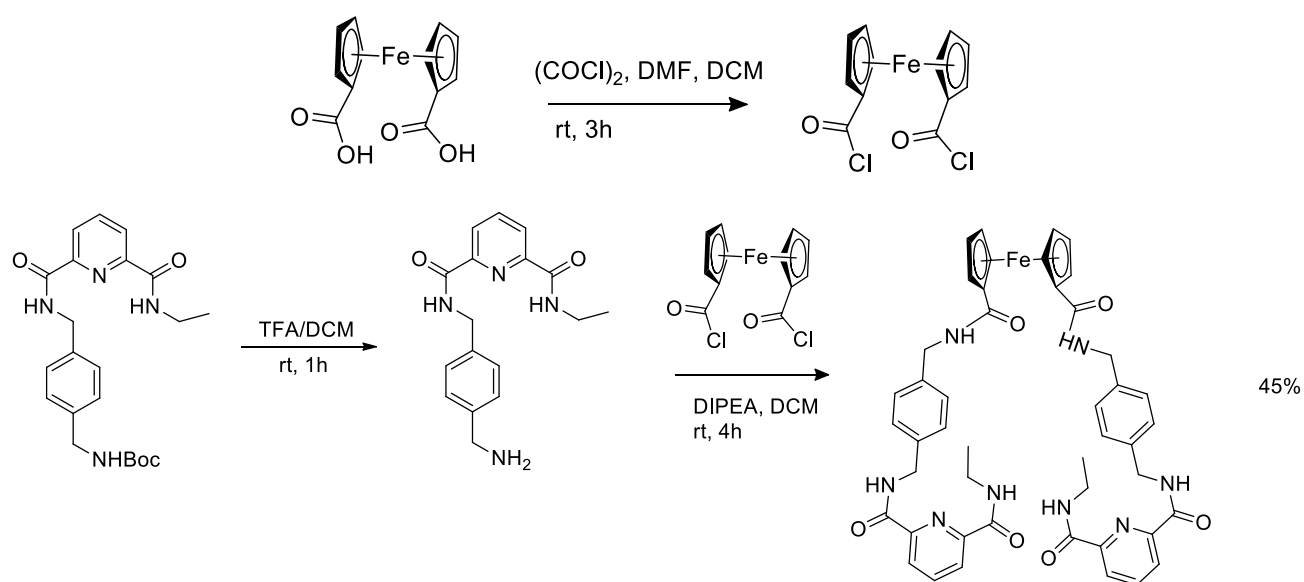

**Scheme S4.** Synthesis of receptor **3**.

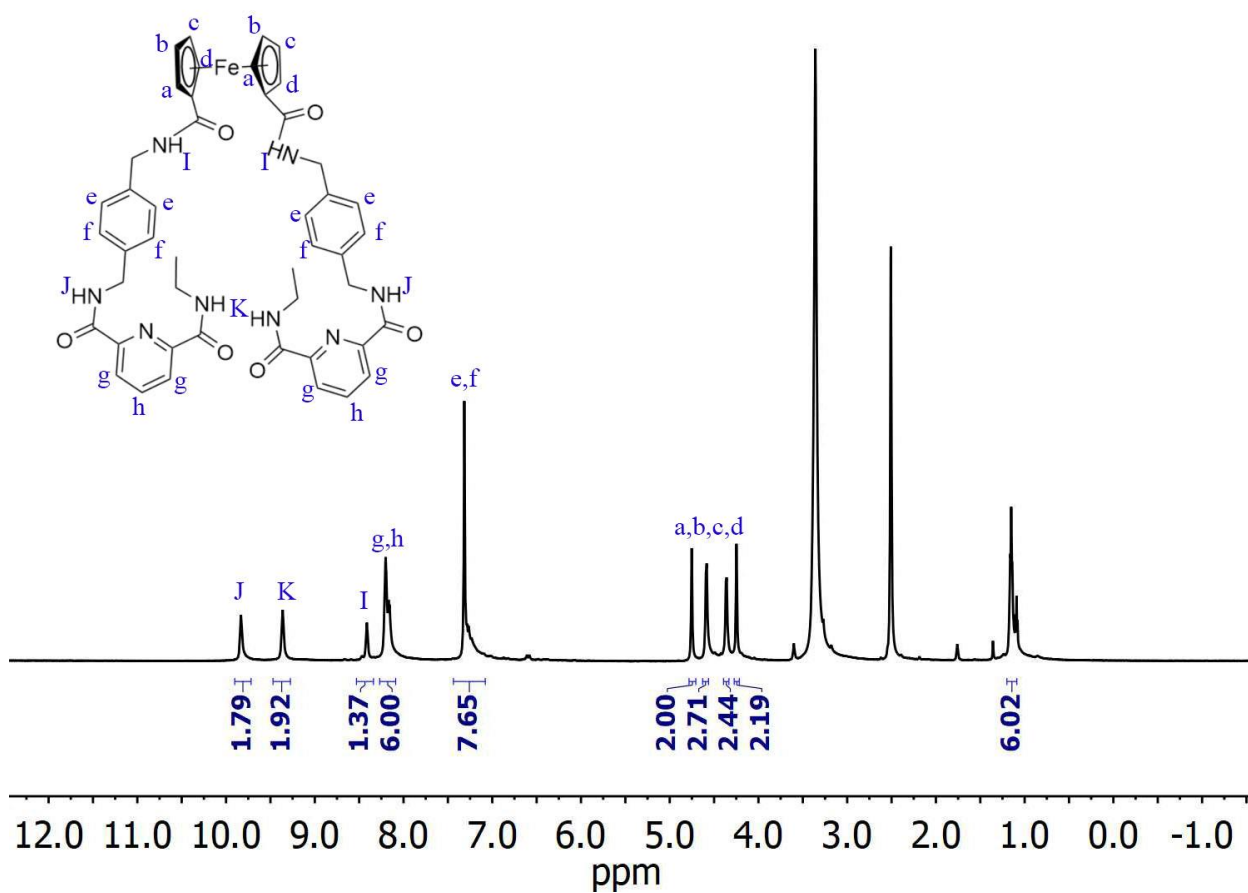

**Figure S7.** <sup>13</sup>C NMR spectrum of receptor 3.

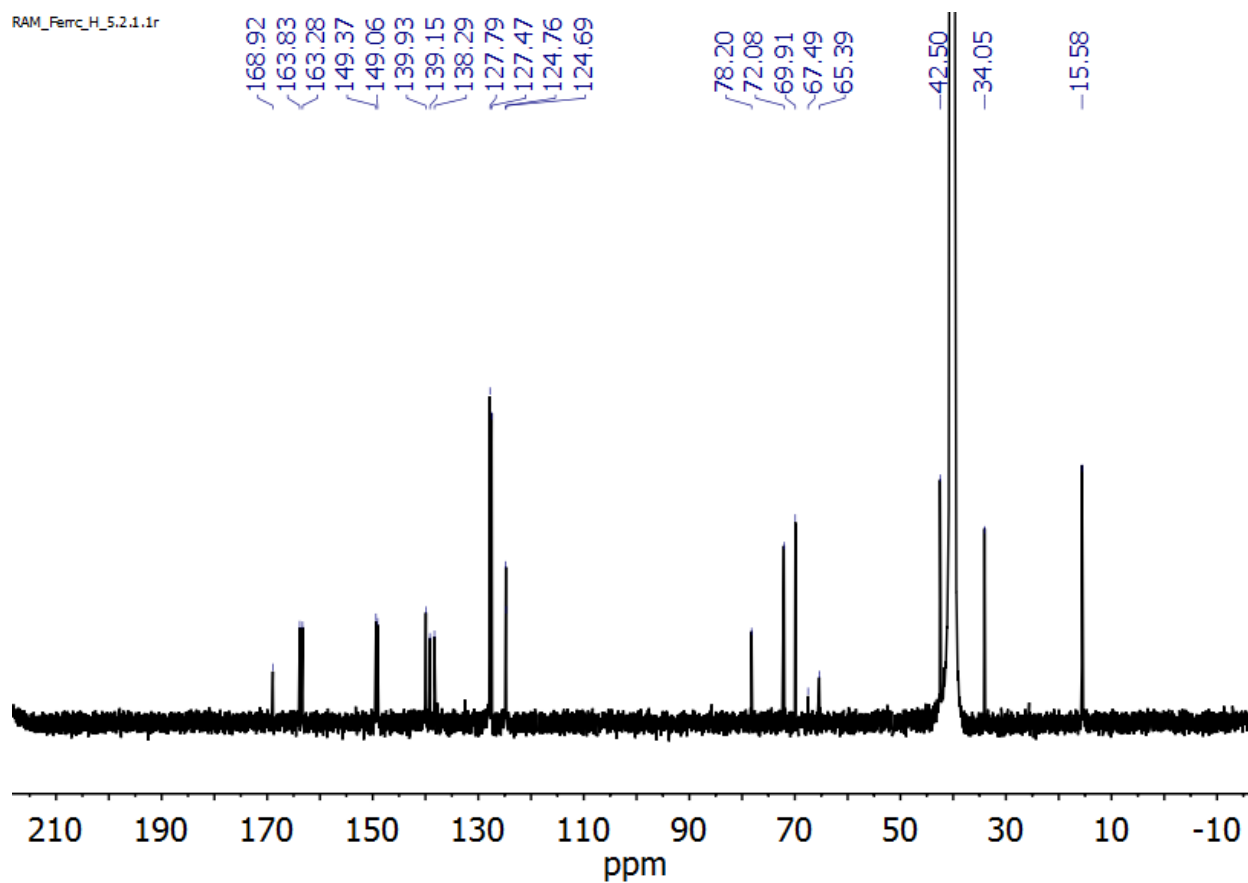

**Figure S8.**  $^{13}\text{C}$  NMR spectrum of receptor **3**.

## 2D NMR spectra of receptor 2

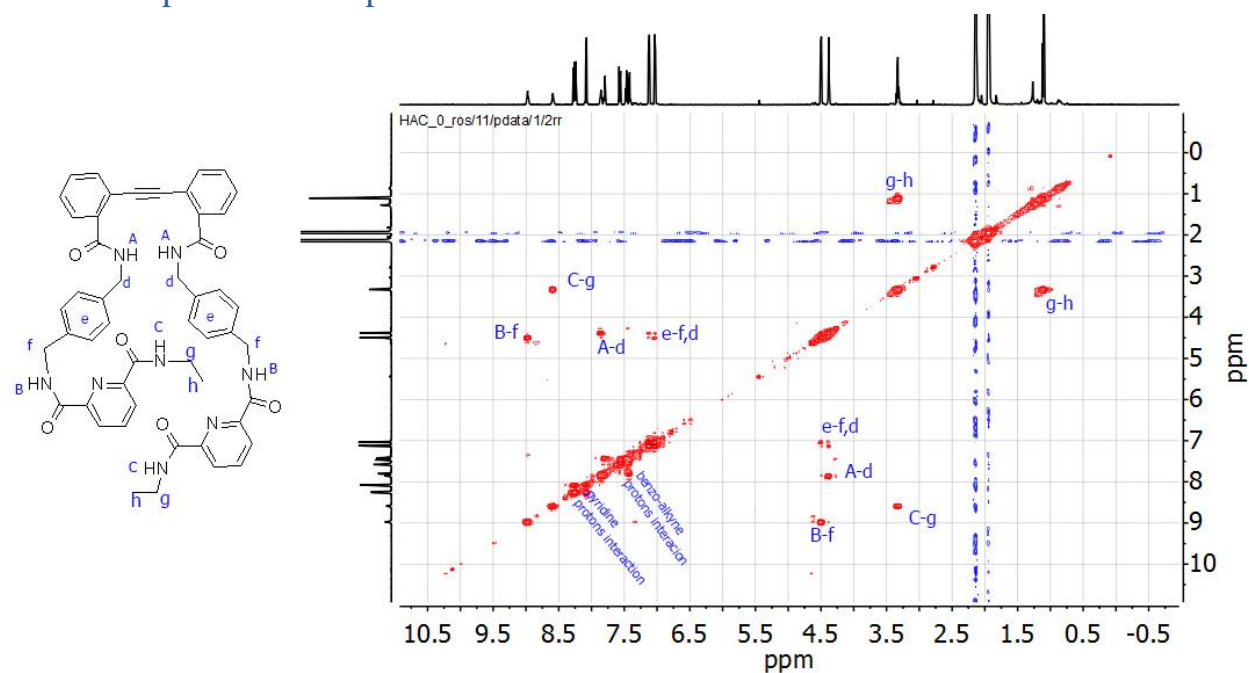

**Figure S9.**  $^1\text{H}$ - $^1\text{H}$  COSY spectrum of receptor **2**.

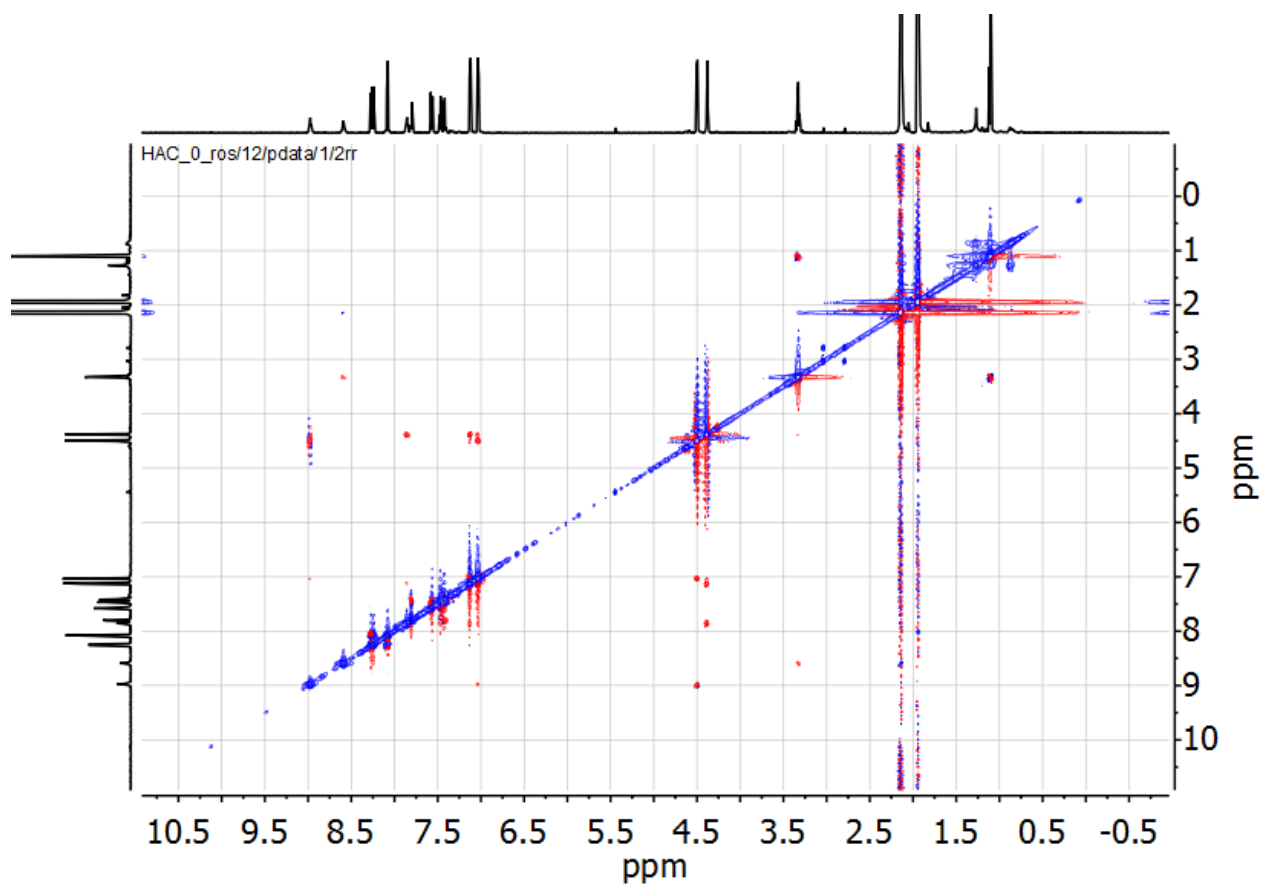

**Figure S10.**  $^1\text{H}$ - $^1\text{H}$  ROESY spectrum of receptor **2**.



## NMR titrations

**Table 1.** Proton shifts observed during NMR titration experiments of Receptor **1** with anions in CH<sub>3</sub>CN (8% CHCl<sub>3</sub>) together with the fitting graphics of the aromatic and NH protons, which were exported from the HypNMR program.

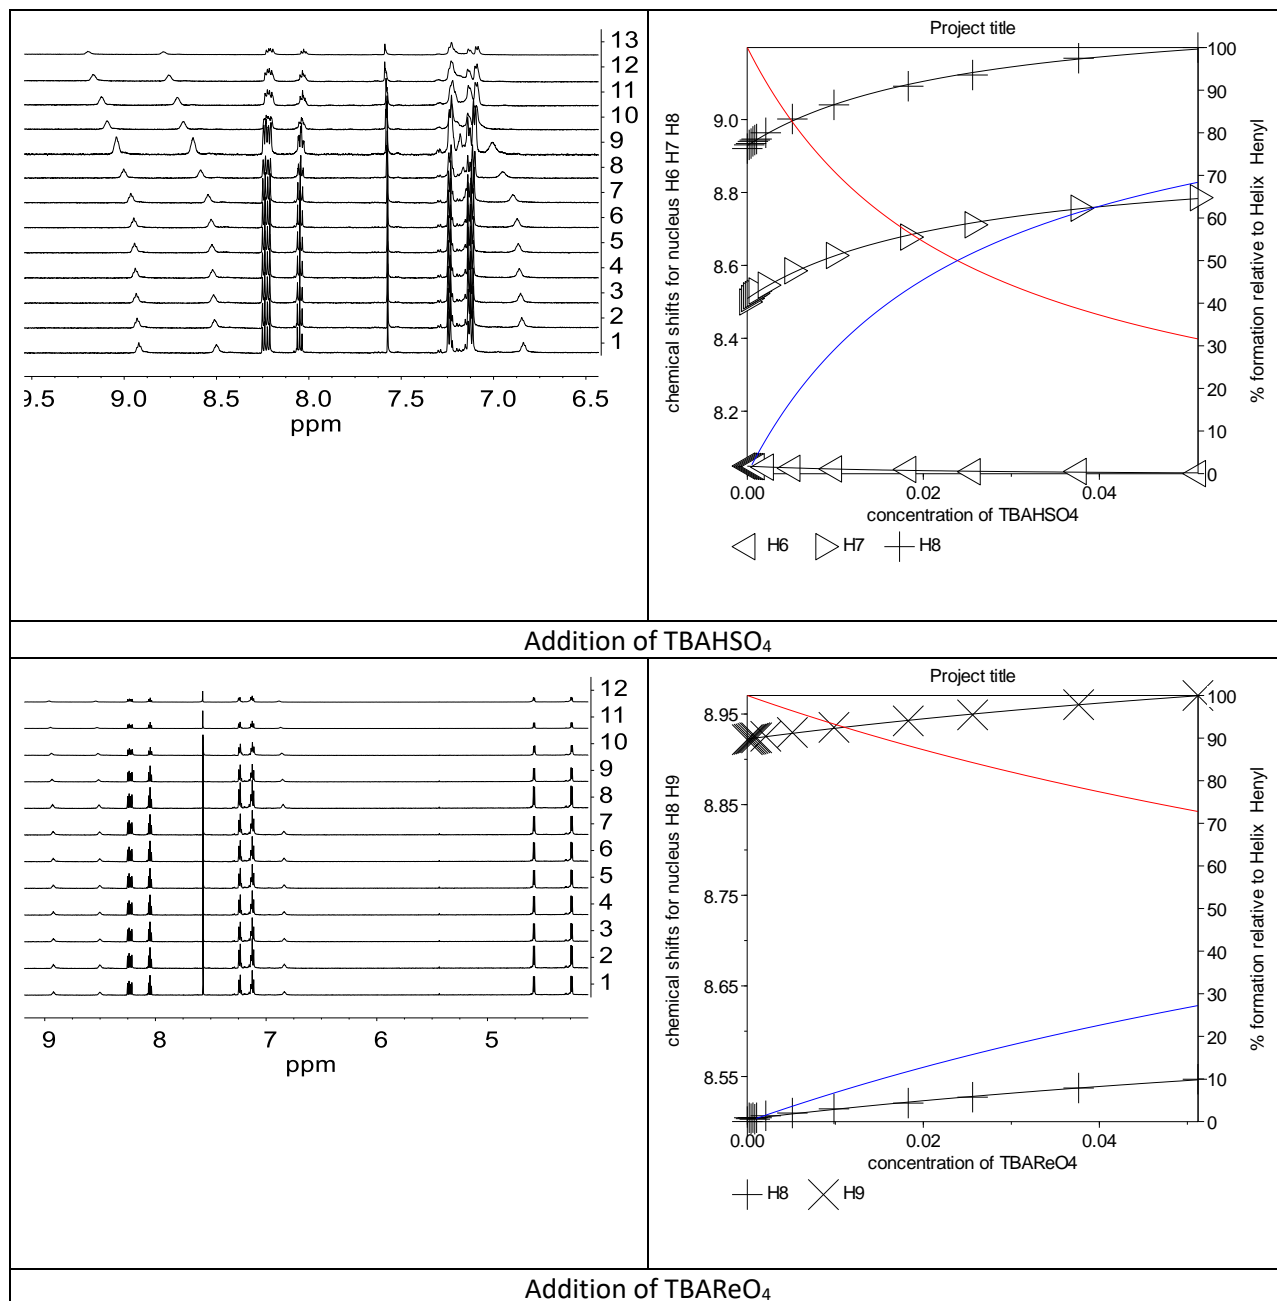

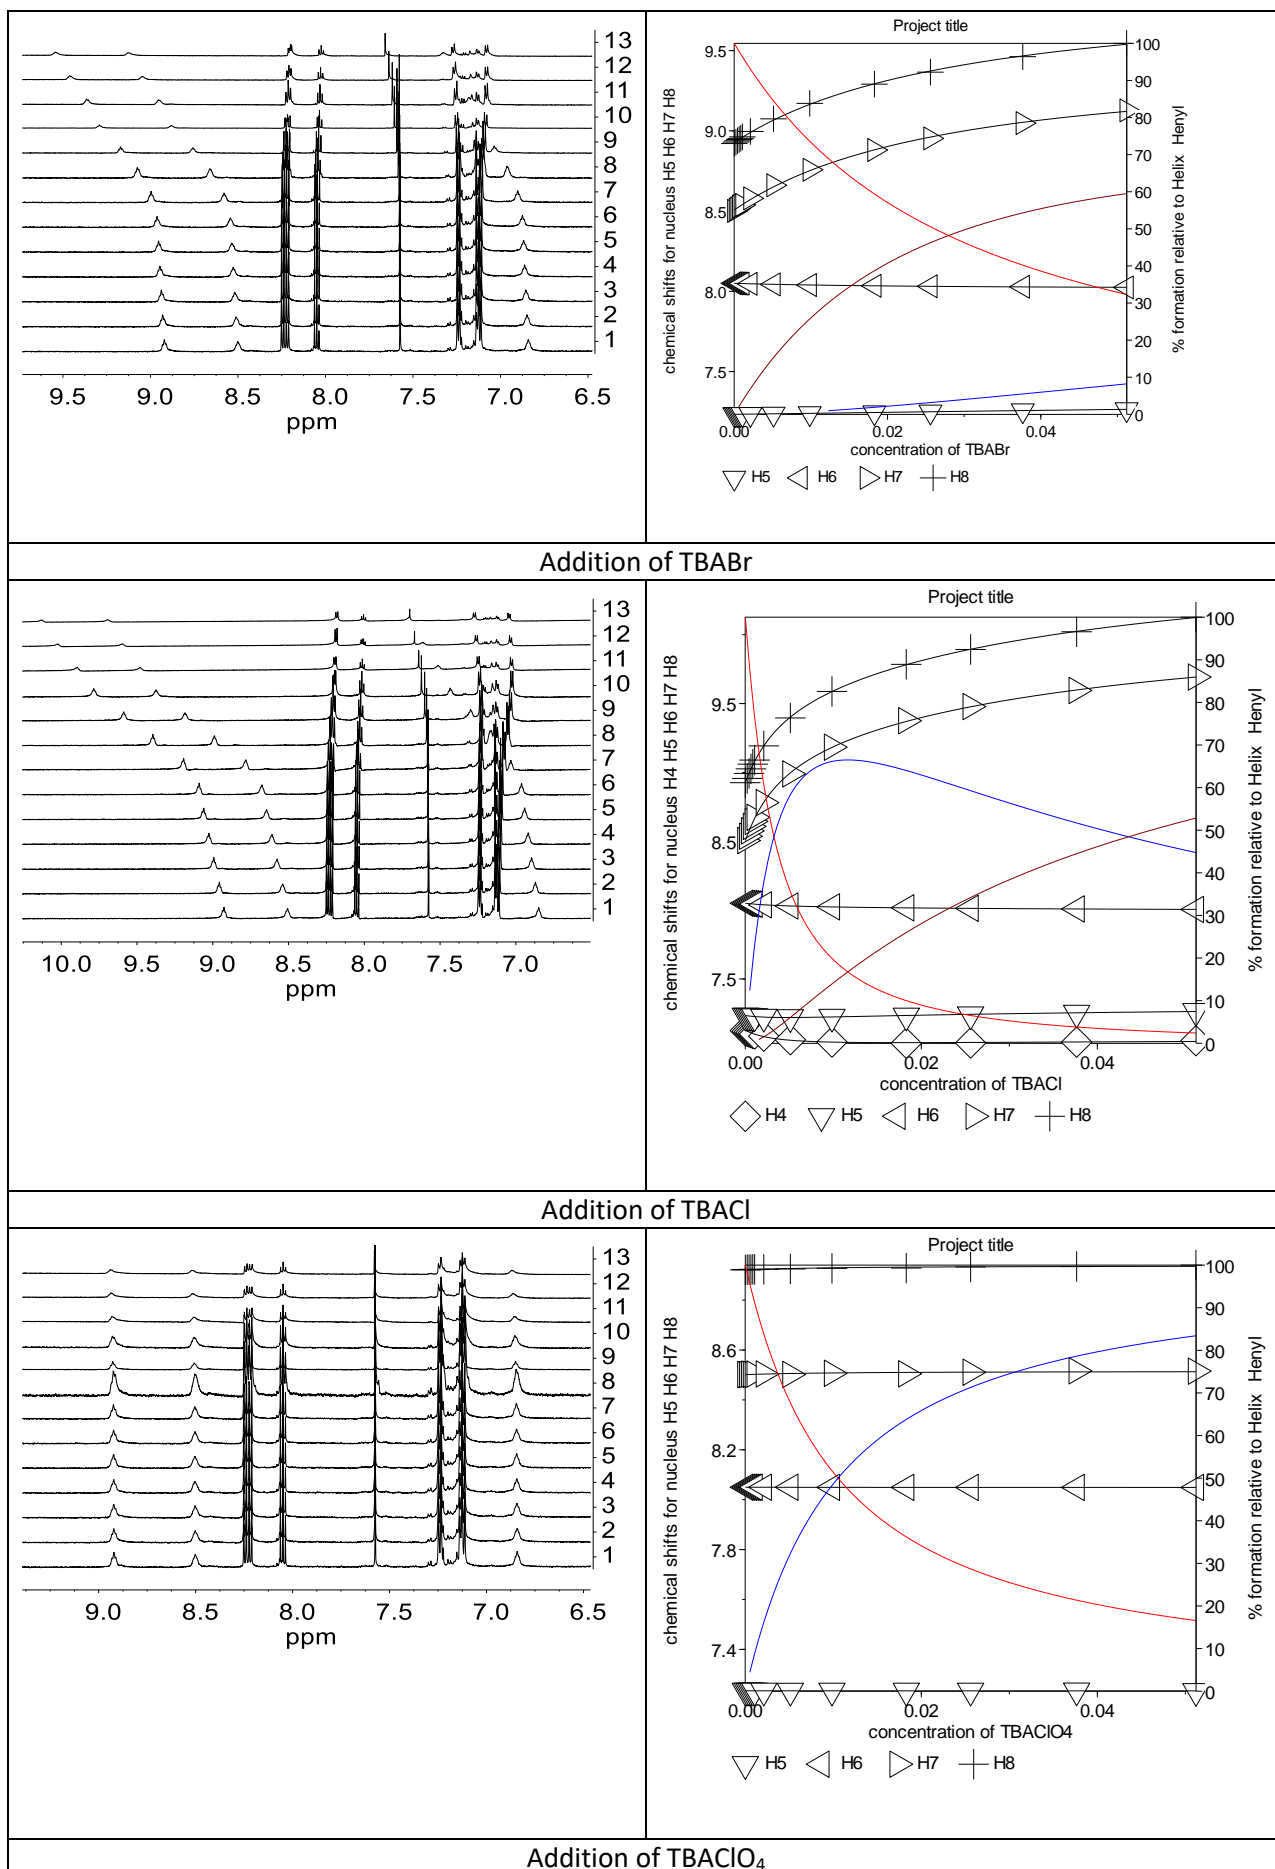

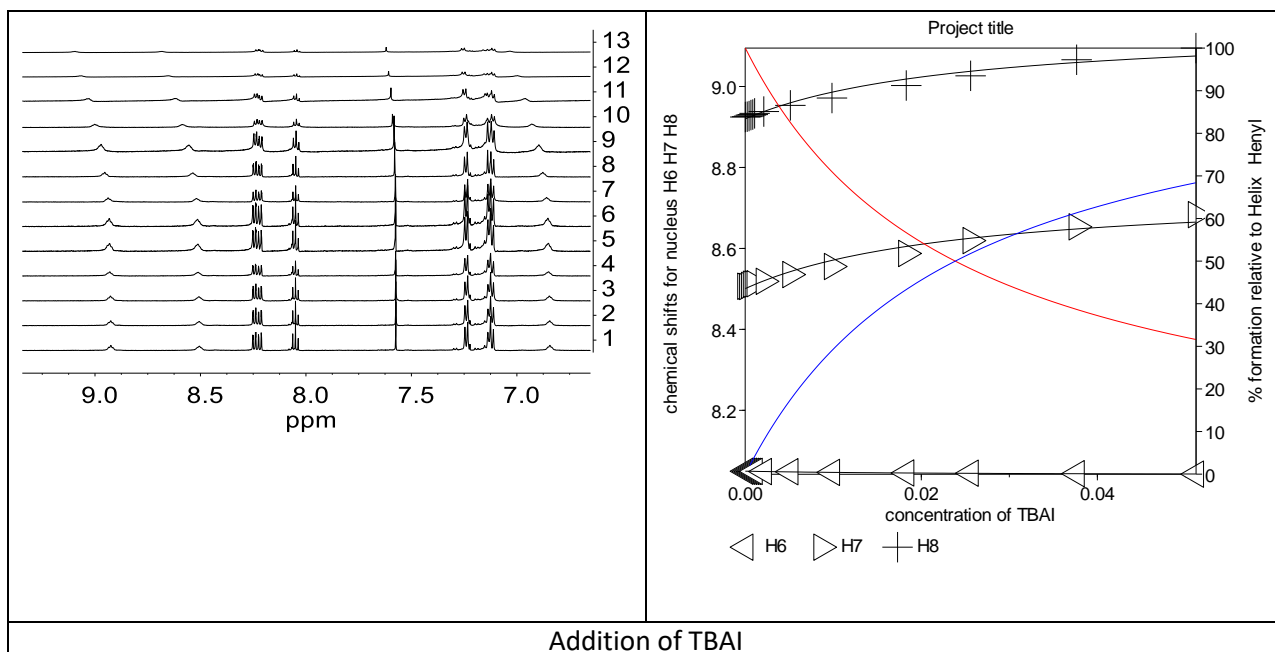

**Table 2.** Proton shifts observed during NMR titration experiments of Receptor **2** with anions in  $\text{CH}_3\text{CN}$  (8%  $\text{CHCl}_3$ ) together with the fitting graphics of the aromatic and NH protons, which were exported from the HypNMR program.

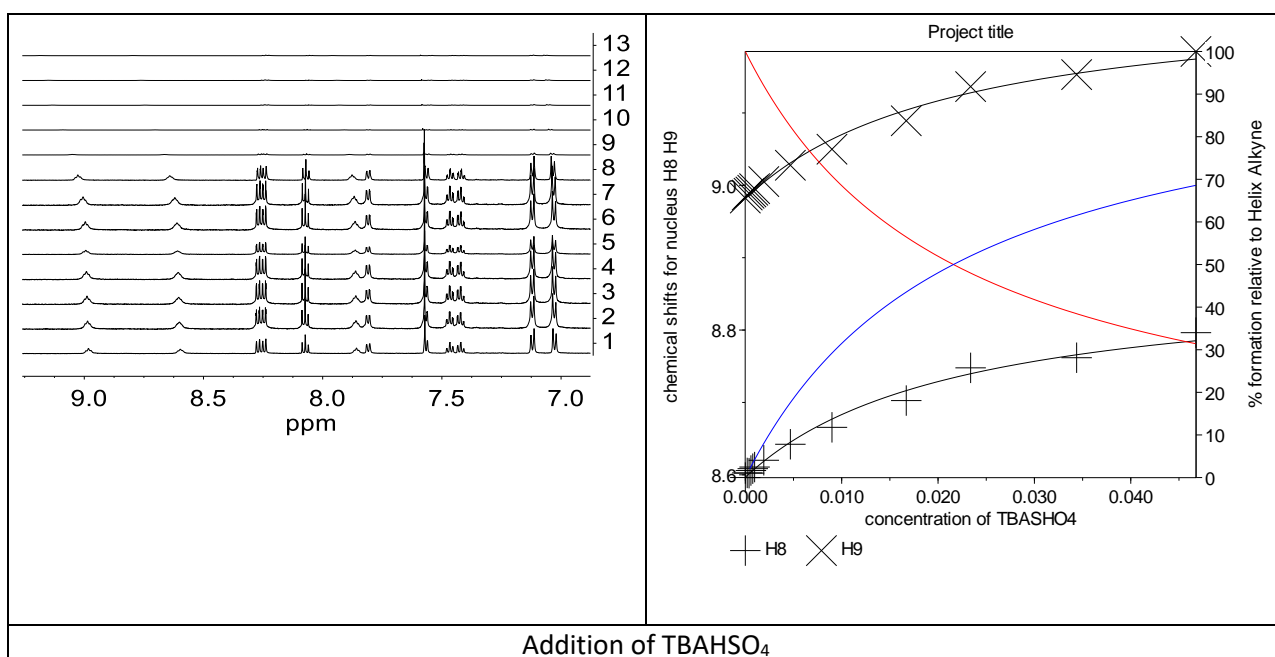

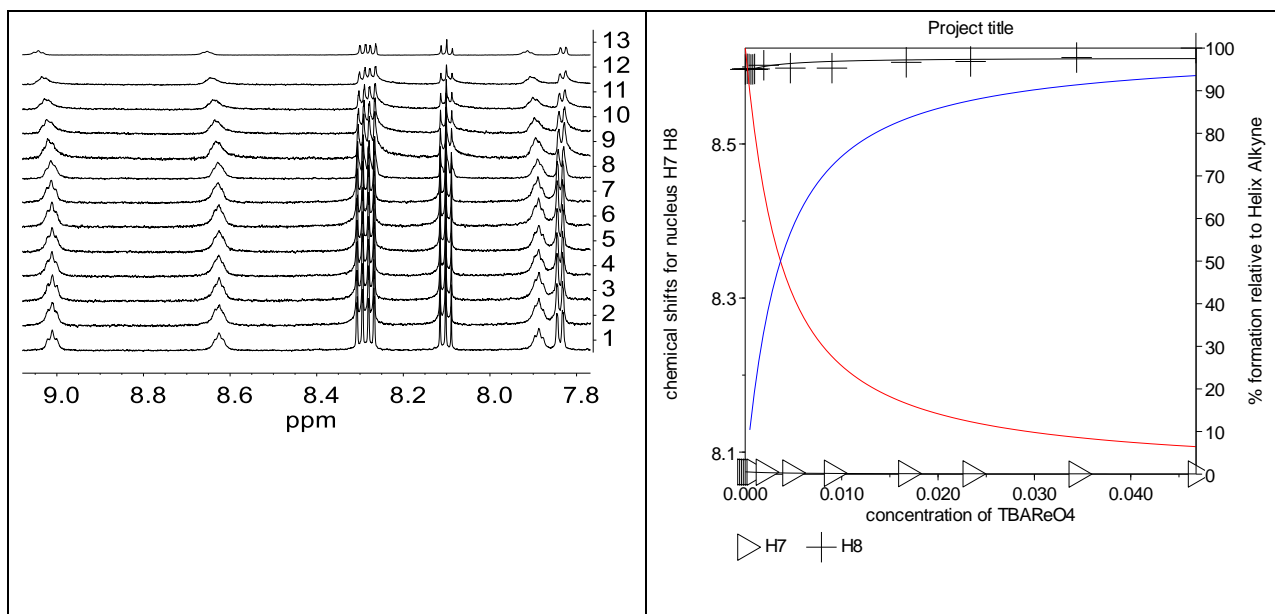

### Addition of TBAREO4

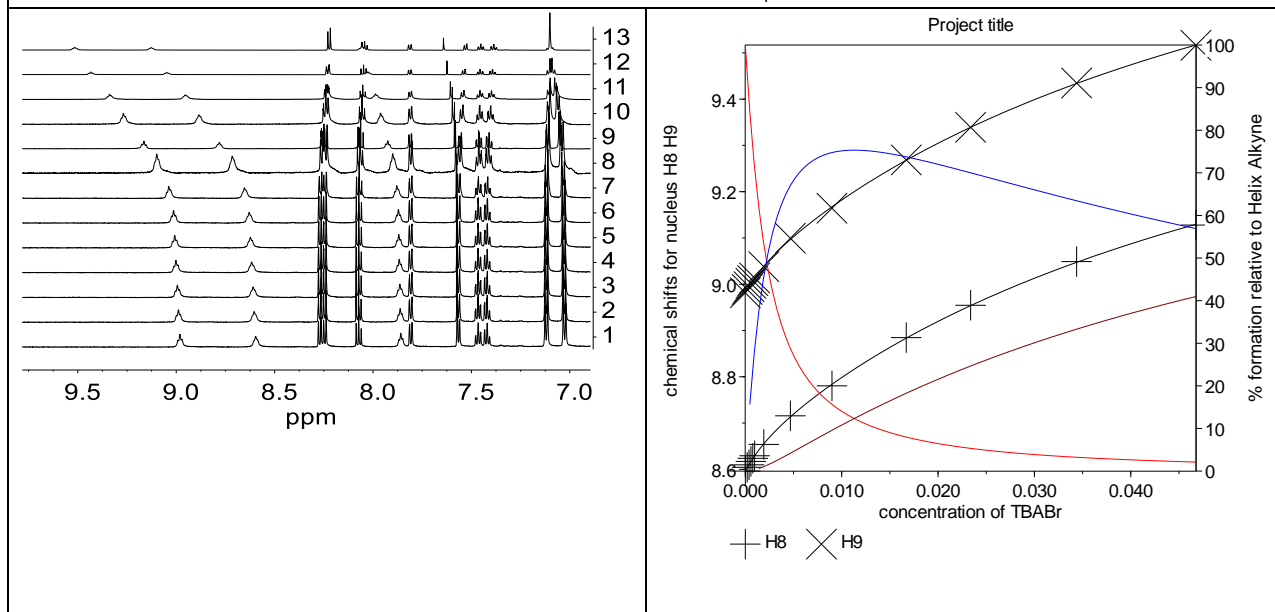

### Addition of TBABr

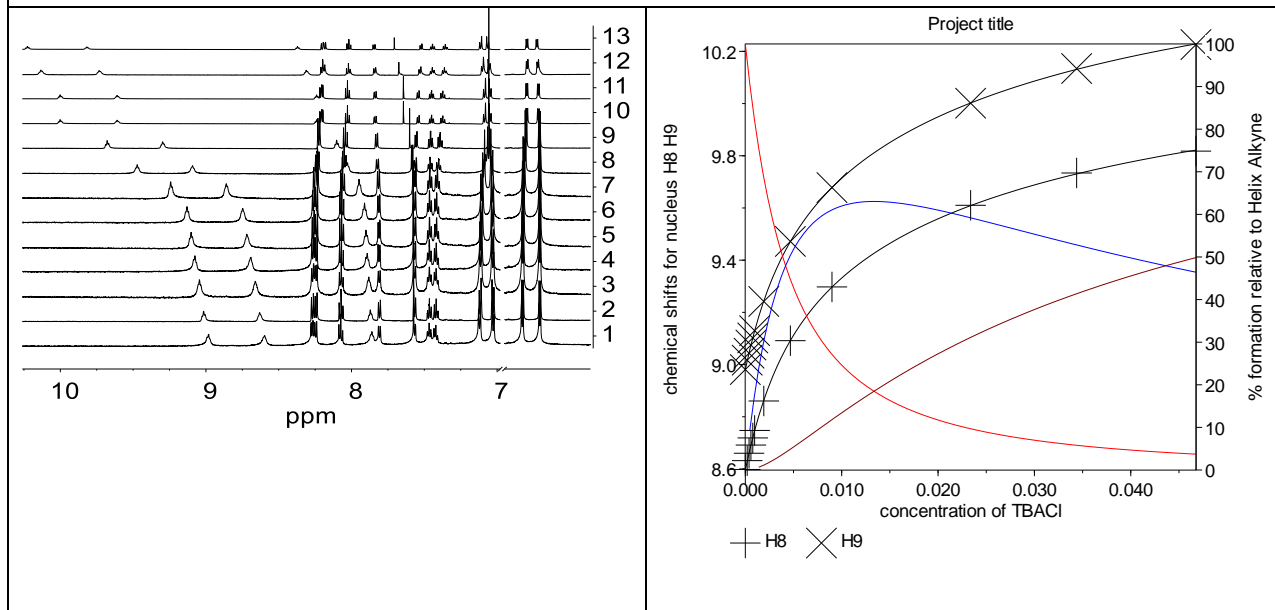

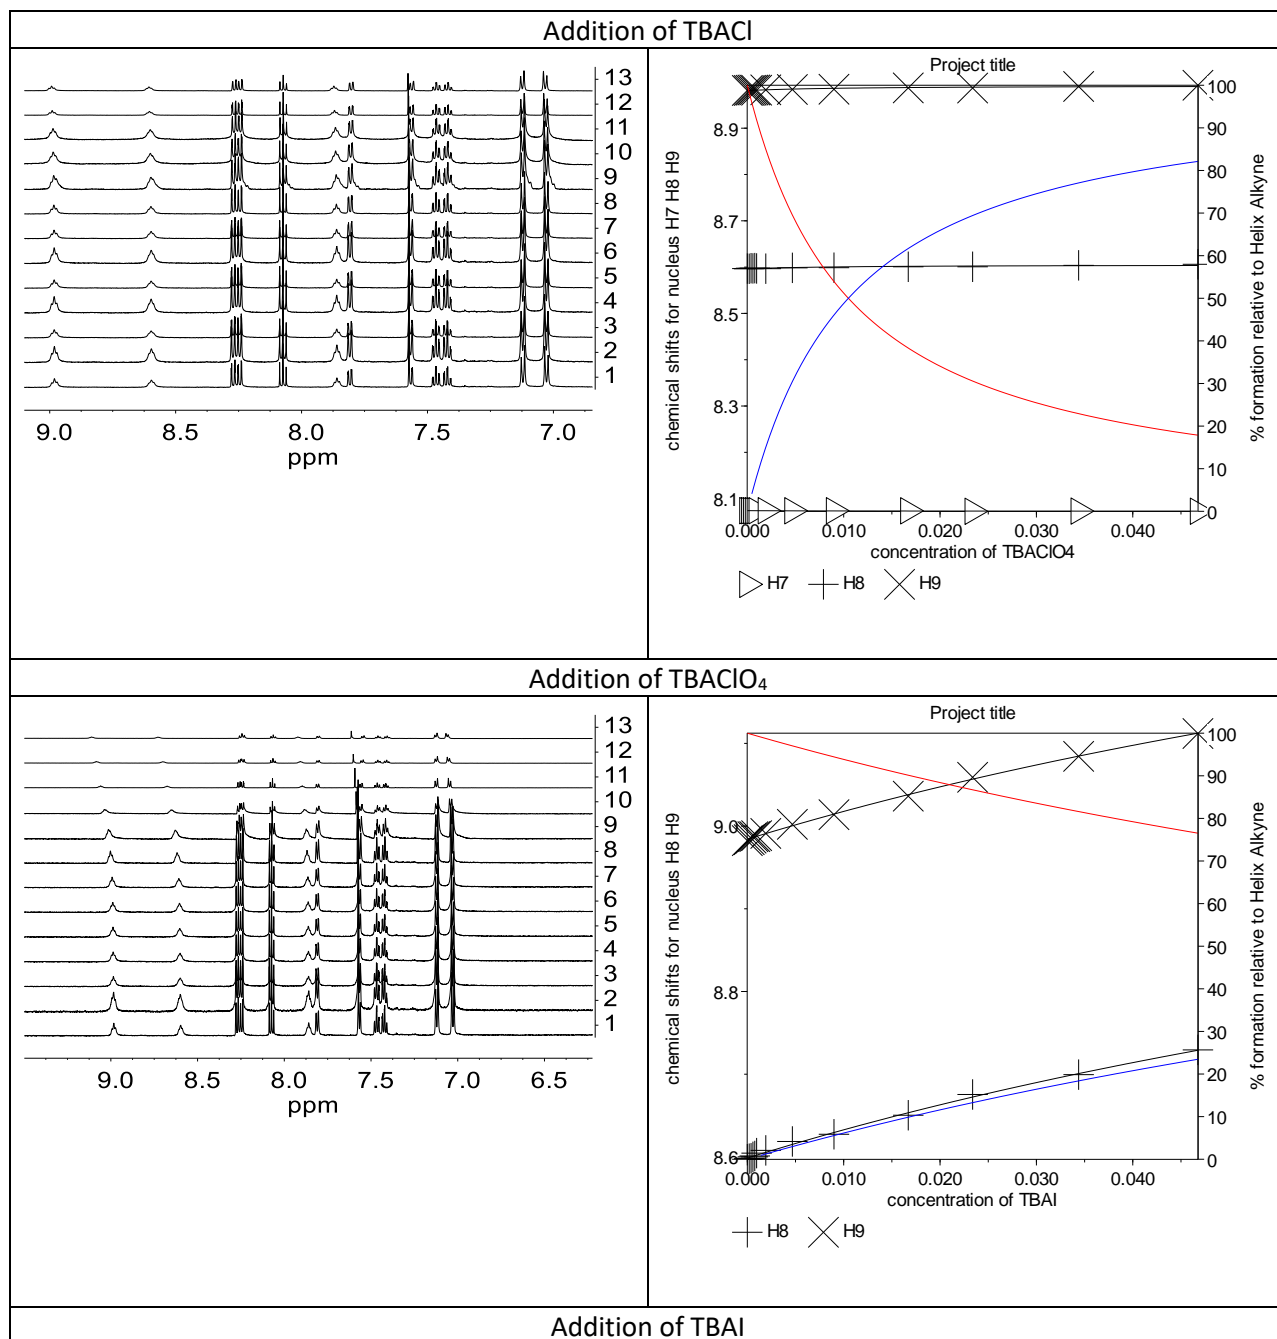

**Table 3.** Proton shifts observed during NMR titration experiments of Receptor **3** with anions in CH<sub>3</sub>CN (8% CHCl<sub>3</sub>) together with the fitting graphics of the aromatic and NH protons, which were exported from the HypNMR program.

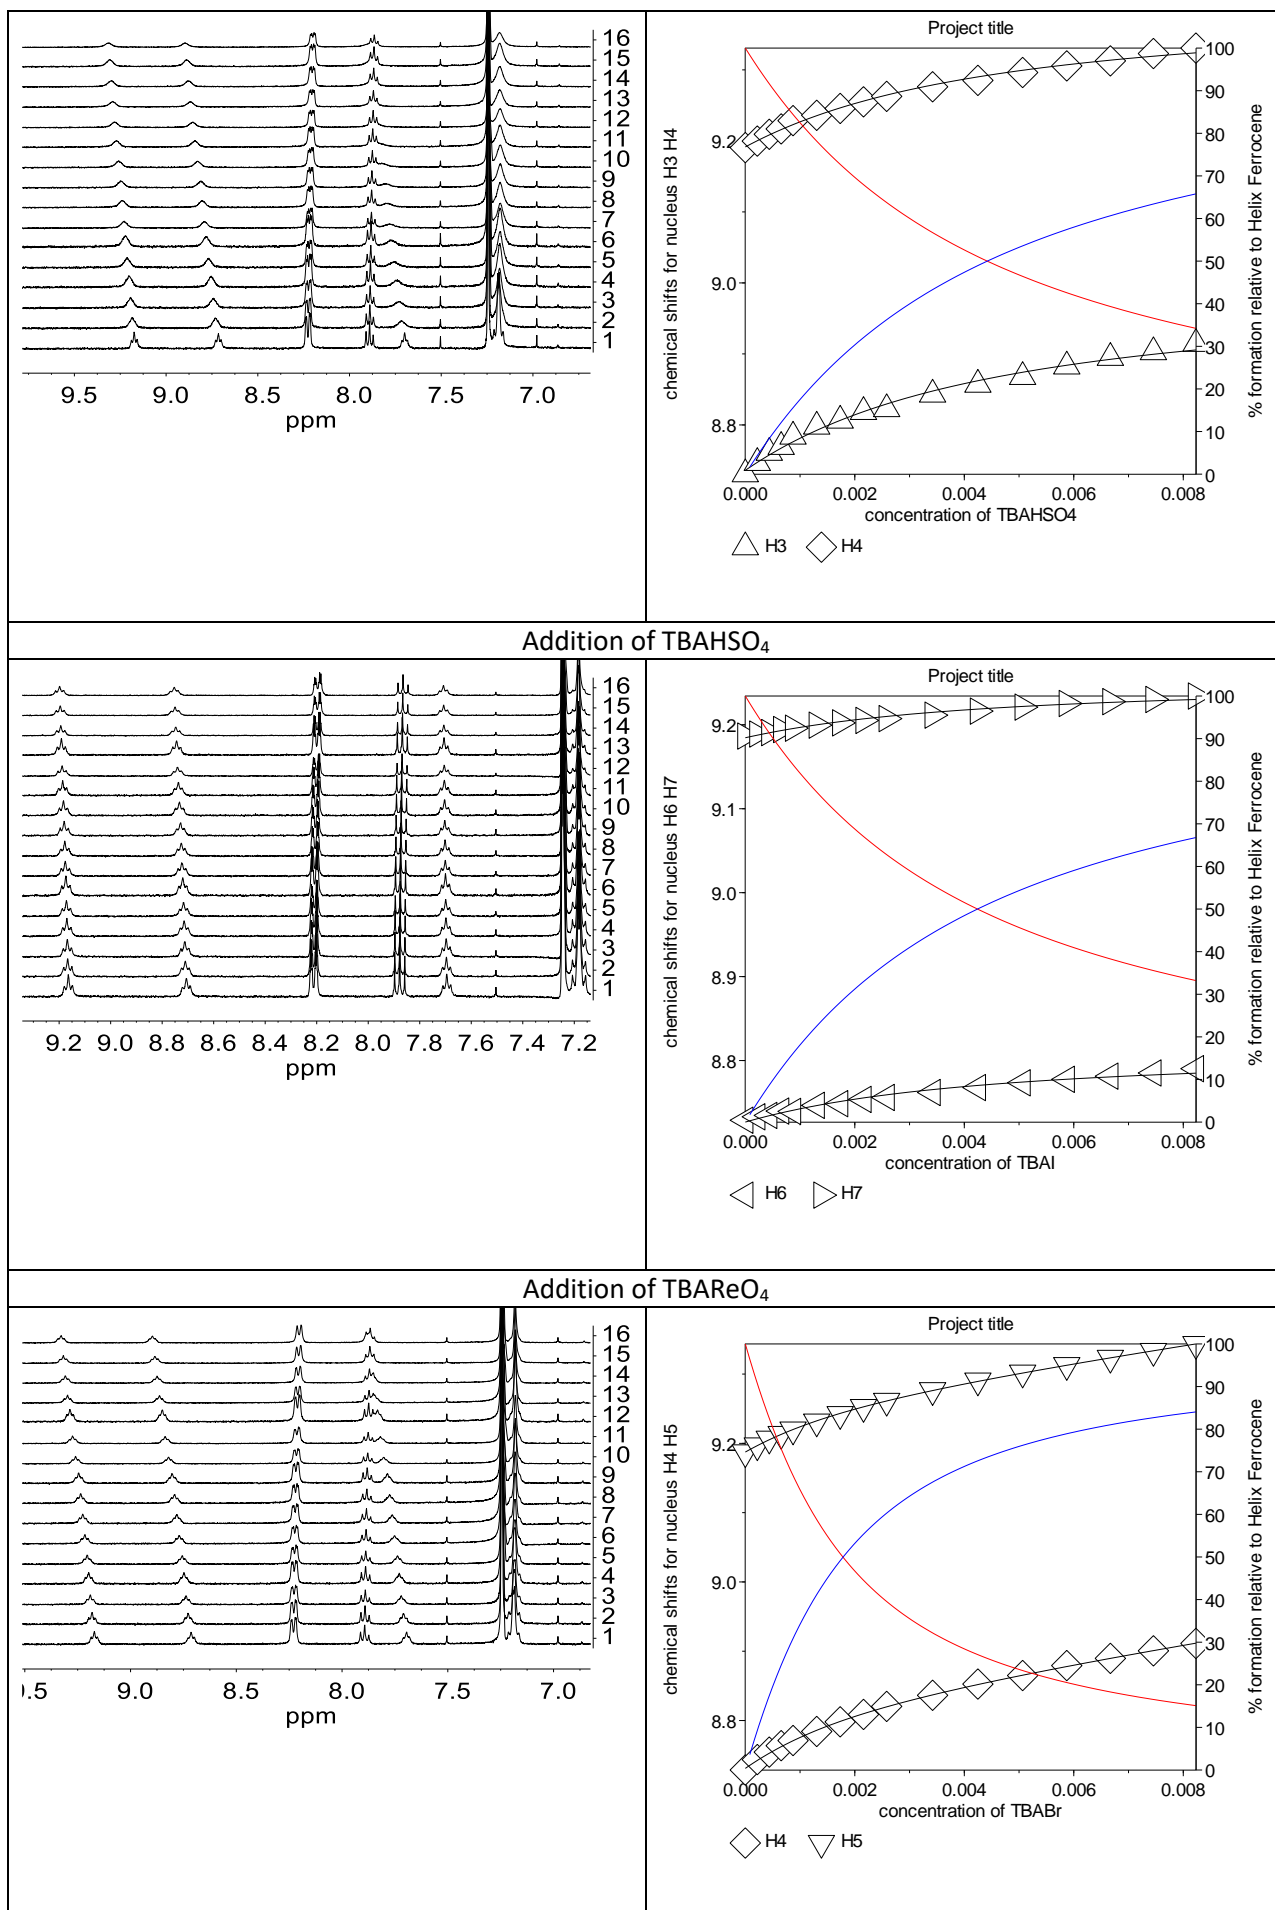

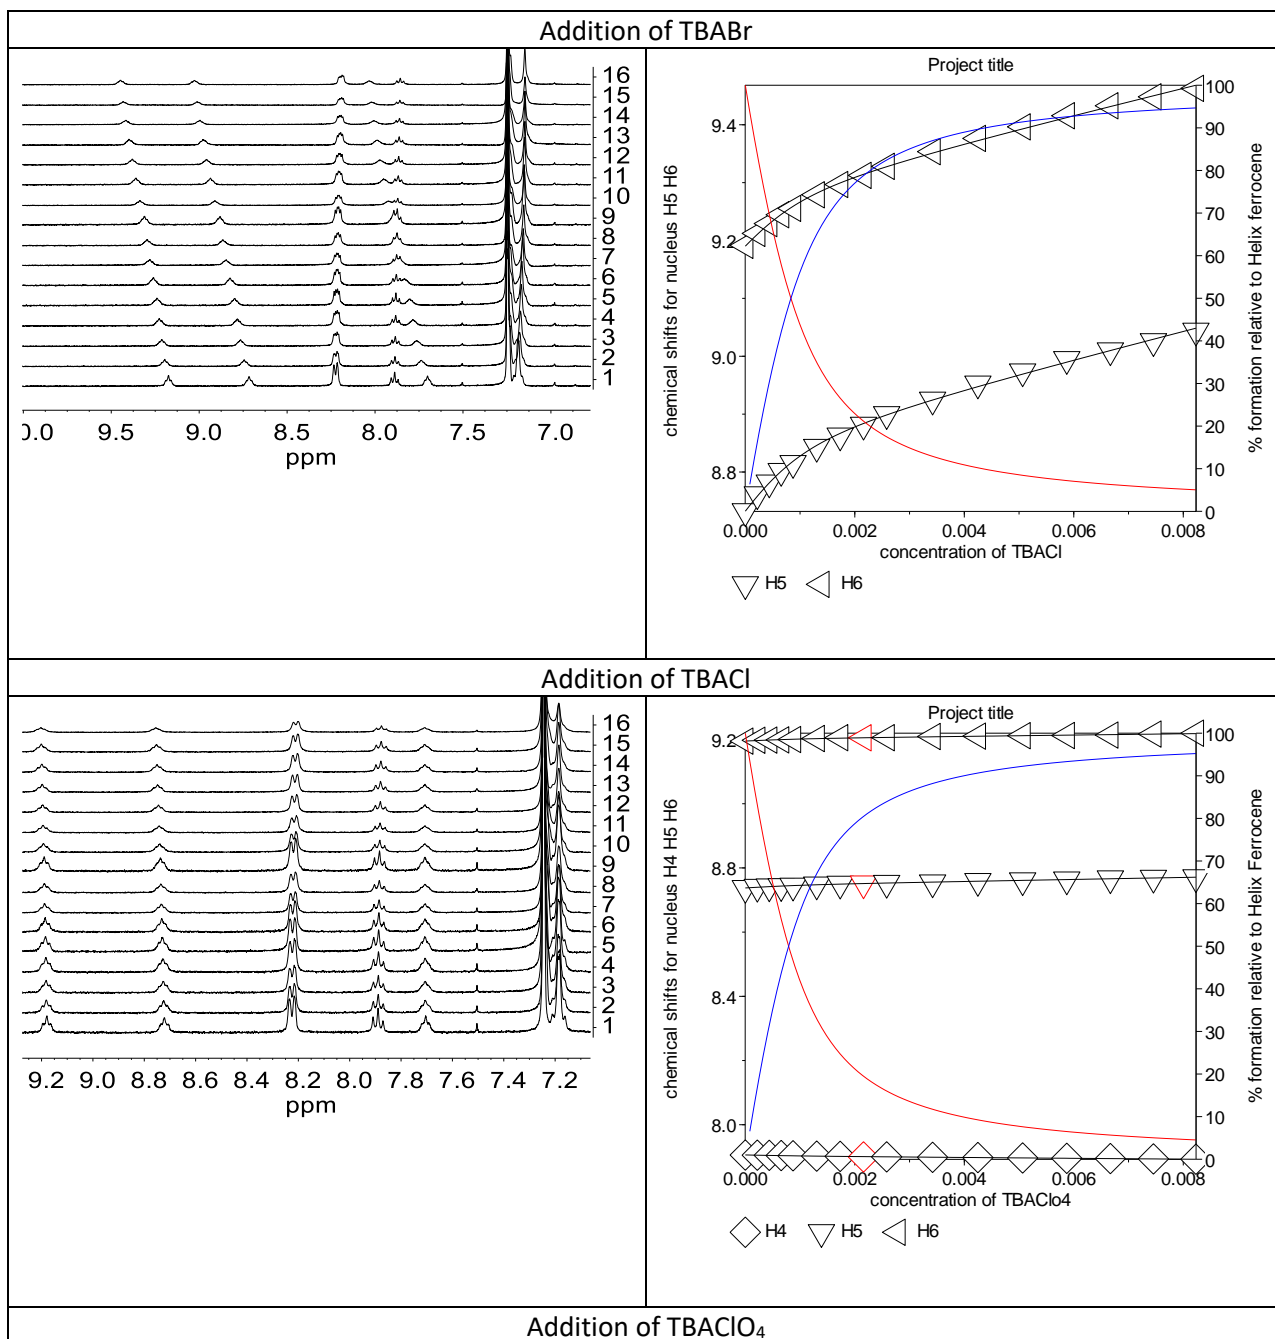

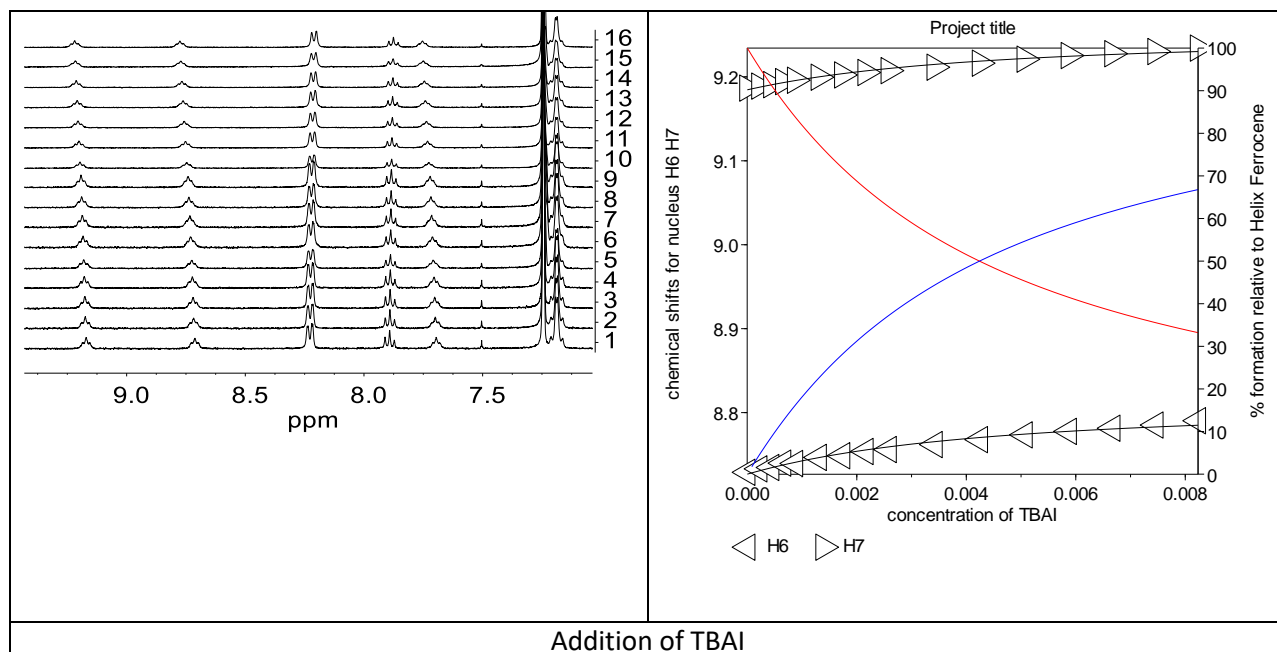

### Dilution experiment.

The solutions of receptor **2** were prepared with different concentrations  $10^{-4}$  to  $10^{-6}$  M in  $\text{CH}_3\text{CN}$  solution containing 8%  $\text{CHCl}_3$ . The UV-Vis spectra were measured. As can be seen in **Figure S11**, the linear relationship was observed over this concentration range indicating the absence of self-aggregation.

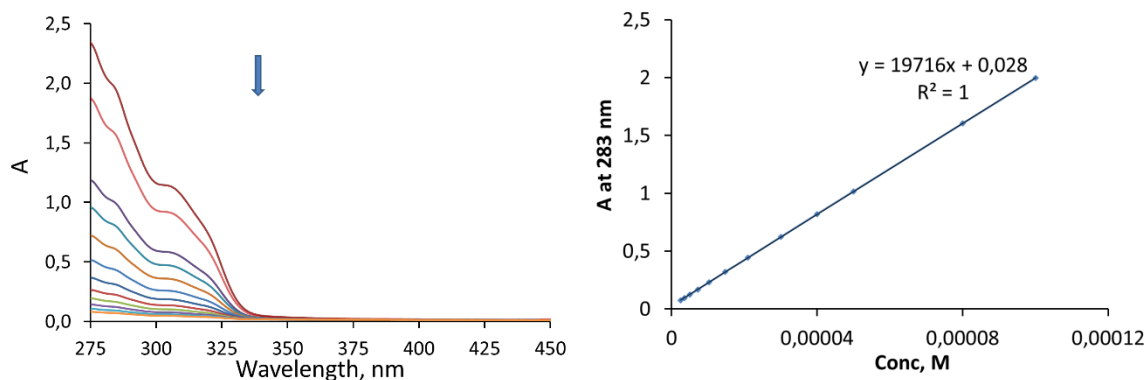

**Figure S11.** UV-Vis spectra of receptor **2** at different concentrations together with the linear fitting analysis.

### UV-Vis titrations.

Stock solutions of receptors with concentrations of  $10^{-5}$  M in a 50 mM acetate buffer (5% DMSO) were prepared for UV-Vis binding studies. The titrant (sodium salt, 0.01M) was sequentially added to a 2 mL sample of the host stock solution in the spectrometric cell and the changes in the spectral features were monitored. The total number of data points was 20-40, depending on the stoichiometry of complexation; for a presumed 1:1 complex 20 points were usually measured. The resulting data was imported in HypSpec program<sup>[4]</sup> and the data was fitted to obtain stability constants with anions. Concentration of receptors is  $10^{-5}$  M.



## Single crystal X-ray analysis

Colourless and plate-like single crystals of **2** suitable for diffraction analyses were grown from methanol. A suitable crystal of **2** with measures of  $0.6 \times 0.4 \times 0.15 \text{ mm}^3$  was selected and mounted in Krytox<sup>®</sup> on a Rigaku-Oxford Gemini S diffractometer by choosing graphite monochromated Mo-K $\alpha$  radiation ( $\lambda = 0.71073 \text{ \AA}$ ) at  $T = 125 \text{ K}$ . The structure was solved by Direct Methods implemented within SHELXS-2013 [1] using the WinGX software platform [2]. All C- and N-bonded hydrogen atoms were refined using a riding model; the positions of all O-bonded hydrogen atoms were taken from Difference Fourier Maps and were refined with respective constraints. The model was refined by full-matrix least-squares procedures on  $F^2$  with SHELXL-2013 [1] until convergence. In the solid state the asymmetric unit of **2** comprises two crystallographically independent molecules of **2**, which interact with co-crystallized MeOH and H<sub>2</sub>O molecules by means of hydrogen bond interaction. The overall formula of the single crystals of **2** used for crystallographic studies amounts to  $[(\mathbf{2})_2 \cdot 3\text{MeOH} \cdot 5\text{H}_2\text{O}]$ . CCDC-2032743 contain the supplementary crystallographic data for **2**. These data can be obtained free of charge from The Cambridge Crystallographic Data Centre via [www.ccdc.cam.ac.uk/data\\_request/cif](http://www.ccdc.cam.ac.uk/data_request/cif).

[1] G. M. Sheldrick, *Acta Cryst.* **2008**, A6, 112–122.

[2] L. J. Farrugia, *J. Appl. Cryst.* **2012**, 45, 849–854.

## DFT calculations

Molecular modeling calculations were performed using the DFT program “PRIRODA”.<sup>3</sup> A PBE function that includes the electron density gradient was used. The TZ2p-atomic basis sets of grouped Gaussian functions were used to solve the Kohn—Sham equations. The criterion for convergence was a difference below 0.01 kcal/mol/Angstrom in energy between two sequential structures. Various stationary points on the potential energy surface (PES) were determined from analytical calculations of the second energy derivatives (Hessian matrixes).
